# Supplementary material
Source: ML conference proceedings conference paper supplement (https://proceedings.neurips.cc/paper_files/paper/2023/hash/b1719f44953c2e0754a016ab267fe4e7-Abstract.html)
Supplement: Supplementary file 1 [file b1719f44953c2e0754a016ab267fe4e7-Supplemental-Conference.zip]

Archive with 6 entries (6 files):
- code/rgams-hessian.py
- code/rset_app.py
- code/rset_opt.py
- code/run.sh
- code/utils.py
- Appendix.pdf
