# Supplementary material
Source: ML conference proceedings conference paper supplement (https://proceedings.neurips.cc/paper_files/paper/2023/hash/b1719f44953c2e0754a016ab267fe4e7-Abstract.html)
Supplement: Supplementary file 1 [file b1719f44953c2e0754a016ab267fe4e7-Supplemental-Conference.zip › code/rgams-hessian.py]

import numpy as np
import pandas as pd
import sys
import argparse
import utils
from rset_opt import *
from sklearn.linear_model import LogisticRegression
from sklearn.model_selection import train_test_split, KFold
import time
import pickle

import rpy2
from rpy2.robjects.packages import importr
from rpy2 import robjects
import rpy2.robjects.numpy2ri
rpy2.robjects.numpy2ri.activate()

def setup_parser():
    parser = argparse.ArgumentParser(
        prog='rgams-hessian',
        description='train Rashomon sets',
        epilog='Copyright (C) 2022 authors',
        formatter_class=argparse.ArgumentDefaultsHelpFormatter
    )

    parser.add_argument('--data',
                        type=str,
                        required=True,
                        help='csv file with training data')

    parser.add_argument('--lamb0s',
                        type=float,
                        nargs='+',
                        required=True,
                        help='a list of lamb0s')
    
    parser.add_argument('--lamb2s',
                        type=float,
                        nargs='+',
                        required=True,
                        help='a list of lamb2s')
    
    parser.add_argument('--multipliers',
                        type=float,
                        nargs='+',
                        required=True,
                        help='a list of multipliers')
    return parser


def fit_fastsparse(X, y, tmp_lambda0=None, tmp_lambda2=None):
    """
    X, y: numpy arrays. X shape is n*(p+1) and y is either 1 or -1. 
    """
    base = importr('base')
    FastSparse = importr('FastSparse')
    np.random.seed(seed=3337)

    if tmp_lambda0 is None:  
        tmp_lambda0 = 1
    
    if tmp_lambda2 is None:
        tmp_lambda2 = 1e-5

    d = {'package.dependencies': 'package_dot_dependencies', 'package_dependencies': 'package_uscore_dependencies'}
    FastSparse = importr('FastSparse', robject_translations = d)

    fit = FastSparse.FastSparse_fit(X, y, loss="Logistic", penalty="L0L2", intercept=True, algorithm="CDPSI", maxSuppSize = 300, autoLambda=False, lambdaGrid=[tmp_lambda0], nGamma = 1, gammaMin = tmp_lambda2, gammaMax = tmp_lambda2)
   
    betas_fastSparse = base.as_matrix(FastSparse.coef_FastSparse(fit))
    betas_fastSparse = np.asarray(betas_fastSparse)


    return betas_fastSparse


if __name__ == '__main__':
    parser = setup_parser()
    parsed = parser.parse_args()

    dname = parsed.data
    lamb0s = parsed.lamb0s # list
    lamb2s = parsed.lamb2s # list
    multipliers = parsed.multipliers # list
    print(lamb0s, lamb2s)
    
    data = pd.read_csv("../datasets/{}.csv".format(dname))
    X_orig, counts = utils.one_hot_encoding(data.iloc[:,:-1], one_hot=False) # n*p, no intercept column
    y_orig = pd.DataFrame(data.iloc[:,-1]) # {0,1}
    header = list(X_orig.columns)
    header = pd.Index(["intercept"] + header)
    header = header.astype("object")
    print("header dimension", len(header), flush=True)

    X, y = utils.get_X_y(X_orig, y_orig) # add a column of one to X_orig and make y in {1,-1}

    for tmp_lambda0 in lamb0s:
        for tmp_lambda2 in lamb2s:
            lamb = 2 * tmp_lambda2
            w = fit_fastsparse(X_orig.values, y, tmp_lambda0=tmp_lambda0*y.shape[0], tmp_lambda2=tmp_lambda2)
            w = w.ravel() # (p+1, ) 
            acc, auc = utils.get_acc_and_auc(w, X, y)
            print("lamb0:{}, lamb2:{}, acc:{}, auc:{}, supp_size:{}".format(tmp_lambda0, tmp_lambda2, acc, auc, np.count_nonzero(w)), flush=True)
            
        
            # new binary to one hot
            # X_new: (n*m+1) np array; w_new: (m+1,) np array; header_new: m+1 list
            y = y.ravel()
            X_new, header_new = utils.binary_to_one_hot(data.iloc[:,:-1], w, header)
            sample_p = X_new.sum(0)/X_new.shape[0]
            # sample_p[0] = 1e-5
            assert(sample_p.min()!=0)
            X_new_normalized = X_new/np.sqrt(sample_p)
            LR_model = LogisticRegression(penalty="l2", C=1/lamb, fit_intercept=True, solver='liblinear', intercept_scaling=10000, max_iter=1000)
            LR_model.fit(X_new_normalized[:,1:], (y+1)//2) # change y to {0,1}
            print(LR_model.intercept_.shape)
            print(LR_model.coef_.shape)
            w_new_normalized = np.c_[LR_model.intercept_, LR_model.coef_]
            w_new = w_new_normalized/np.sqrt(sample_p)
            w_new_normalized = w_new_normalized.ravel()
            w_new = w_new.ravel() # (m+1,) np array
            print(w_new)

            print(X_new.shape, w_new.shape, X_new_normalized.shape, w_new_normalized.shape)
            log_loss = utils.get_log_loss(X_new, y, w_new, tmp_lambda2, sample_p)
            log_loss_normalized = utils.get_log_loss(X_new_normalized, y, w_new_normalized, tmp_lambda2, np.ones(X_new.shape[1]))
            print('objective:', log_loss, "objective in LR", log_loss_normalized)

            H = utils.hessian(w_new, X_new, y, tmp_lambda2, sample_p)


            for multiplier in multipliers:
                outfile = "results/{}_{}_{}_{}.p".format(dname, tmp_lambda0, tmp_lambda2, multiplier)
                eps = log_loss * multiplier
                print("m:{}, log objective:{}, eps:{}".format(multiplier, log_loss, eps))

                
                results = {
                    "date": time.strftime("%d/%m/%y", time.localtime()),
                    "data_file": dname,
                    "X": X_new,
                    "sample_proportion": sample_p, # remember to add
                    "lamb0": tmp_lambda0,
                    "lamb2": tmp_lambda2,
                    "p": w_new.shape[0], # including intercept, (m+1,)
                    "multiplier": multiplier, 
                    "header_new": header_new,
                    "rset_bound": eps, 
                    "w_orig": w_new, 
                    "log_loss_orig": log_loss,
                    "hessian": H
                }
                
                with open(outfile, 'wb') as out:
                    pickle.dump(results, out, protocol=pickle.DEFAULT_PROTOCOL)

                model = RSetOPT(outfile)
                model.finetune_ellipsoid()
                model.get_precision()
                H_ours = model.get_normalized_H()
                w_orig_ours = model.w_orig
                model.update_file(H_ours, w_orig_ours)
