# Supplementary material
Source: ML conference proceedings conference paper supplement (https://proceedings.neurips.cc/paper_files/paper/2023/hash/b1719f44953c2e0754a016ab267fe4e7-Abstract.html)
Supplement: Supplementary file 1 [file b1719f44953c2e0754a016ab267fe4e7-Supplemental-Conference.zip › code/run.sh]

#!/bin/bash

#set job parameters
dname="diabetes"

  
#run command
python3 "rgams-hessian.py"  \
    --data "${dname}" \
    --lamb0s 1e-3\
    --lamb2s 1e-3\
    --multipliers 1.01

exit
W
